# Supplementary material for: Morphology-controlled synthesis and enhanced energy product (BH)max of CoFe2O4 nanoparticles
Source: Royal Society of Chemistry journal article supplement (doi:10.1039/c8nj02177e), 2018-01-01
Supplement: c8nj02177e1.pdf [file c8nj02177e1.pdf]

## Supporting information

### Morphology controlled synthesis and enhanced energy product $(BH)_{\max}$ in $\text{CoFe}_2\text{O}_4$ nanoparticles

Yogendra Kumar<sup>1</sup>, Alfa Sharma<sup>1</sup>, Md. A. Ahmed<sup>3</sup>, Sawanta S. Mali<sup>4</sup>, Chang Kook Hong<sup>4</sup> and Parasharam M. Shirage<sup>1,2,\*</sup>

<sup>1</sup>Discipline of Metallurgy Engineering and Materials Science, Indian Institute of Technology Indore, Simrol, Indore-453552, India

<sup>2</sup>Discipline of Physics, Indian Institute of Technology Indore, Simrol, Indore-453552, India

<sup>3</sup>Department of Physics, University of Calcutta, Kolkata, 700009, India

<sup>4</sup>Polymer Energy Materials Laboratory, School of Applied Chemical Engineering, Chonnam National University, Gwangju, 500757, South Korea

| Sample | Refinement factors |          |           |           |          |           |         |                       |
|--------|--------------------|----------|-----------|-----------|----------|-----------|---------|-----------------------|
|        | $D$ (nm)           | $\chi^2$ | $R_B$ (%) | $R_F$ (%) | $R_{wp}$ | $R_{exp}$ | $a$ (Å) | $V$ (Å <sup>3</sup> ) |
| CF 1   | 14.45              | 1.28     | 11.61     | 12.84     | 21.78    | 17.09     | 8.382   | 588.90                |
| CF 2   | 19.91              | 1.14     | 6.74      | 7.11      | 17.82    | 15.45     | 8.386   | 589.75                |
| CF 3   | 27.87              | 1.08     | 9.95      | 10.93     | 11.86    | 10.32     | 8.390   | 590.59                |
| CF 4   | 34.58              | 1.14     | 4.185     | 4.647     | 13.43    | 11.20     | 8.391   | 590.99                |
| CF 5   | 43.56              | 1.10     | 5.75      | 6.85      | 24.54    | 22.12     | 8.392   | 591.20                |
| CF 6   | 51.32              | 1.12     | 9.188     | 9.719     | 14.54    | 12.6      | 8.393   | 591.31                |

**Table S1.** Refined factors of the series of cobalt ferrite nanoparticles.

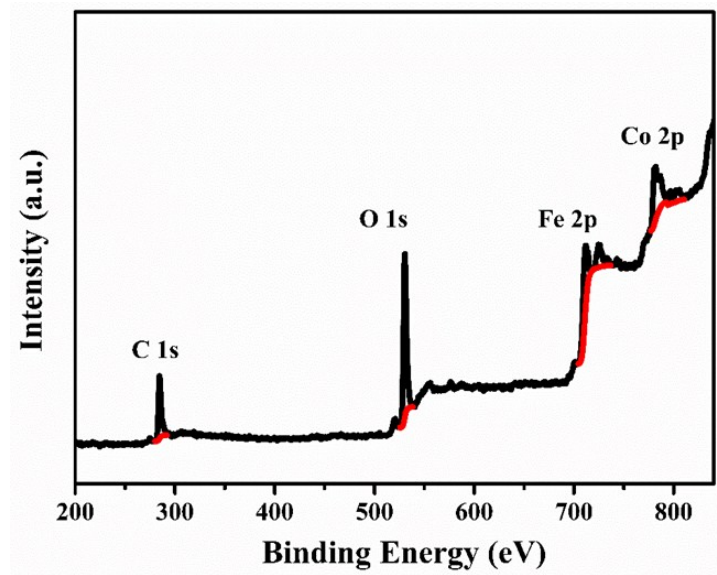

**Figure S1.** The wide scan spectrum of CF-4 NPs.
